# Supplementary material for: Origin of intergranular Li metal propagation in garnet-based solid electrolyte by direct electronic structure analysis and performance improvement by bandgap engineering
Source: Royal Society of Chemistry journal article supplement (doi:10.1039/d0ta04947f), 2020-01-01
Supplement: d0ta04947f1.pdf [file d0ta04947f1.pdf]

# **Origin of intergranular Li metal propagation in garnet-based solid electrolyte by direct electronic structure analysis and performance improvement by bandgap engineering**

Ju-Sik Kim<sup>1†</sup>, Hyunseok Kim<sup>1†</sup>, Michael Badding<sup>2</sup>, Zhen Song<sup>2</sup>, Kihong Kim<sup>3</sup>,  
Yongsu Kim<sup>3</sup>, Dong-Jin Yun<sup>3</sup>, Dongwook Lee<sup>3</sup>, Jaemyung Chang<sup>2</sup>, Sewon Kim<sup>1</sup>,  
Dongmin Im<sup>1</sup>, Seongyong Park<sup>3</sup>, Seong Heon Kim<sup>4\*</sup>, Sung Heo<sup>3\*</sup>

<sup>1</sup> *Next-generation Battery lab, Samsung Advanced Institute of Technology, 130, Samsung-ro, Yeongtong-gu, Suwon-si, Gyeonggi-do, Republic of Korea, 443-803*

<sup>2</sup> *Corning Incorporated, Corning, NY 14831, USA*

<sup>3</sup> *Analytical Engineering Group, Samsung Advanced Institute of Technology, 130, Samsung-ro, Yeongtong-gu, Suwon-si, Gyeonggi-do, Republic of Korea, 443-803*

<sup>4</sup> *Department of Physics, Myongji University, Yongin 17058, Korea*

Keywords: Garnet, LLZO, Laser treatment, SPEM, REELS, Q-DLTS

†Ju-Sik Kim and Seong Heon Kim contributed equally to this study.

\*Corresponding authors: shkim@mju.ac.kr (SHK), prestine@hanmail.net (HS)

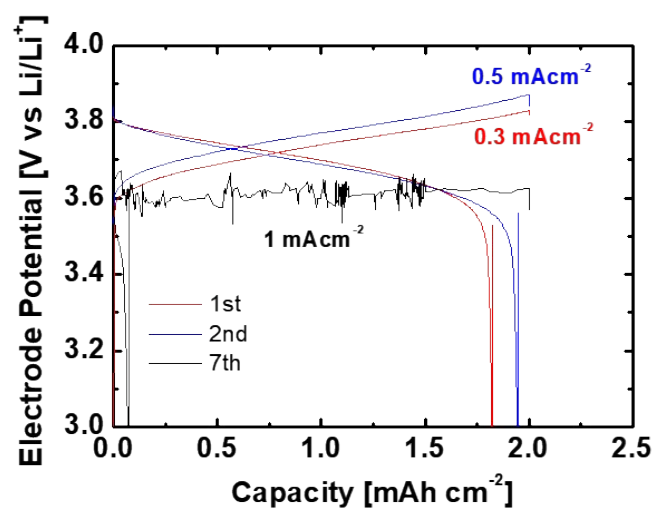

Figure S1. Galvanostatic voltage profiles of the hybrid electrolyte NCM-Li full cell with polished (pristine) LLZTO.

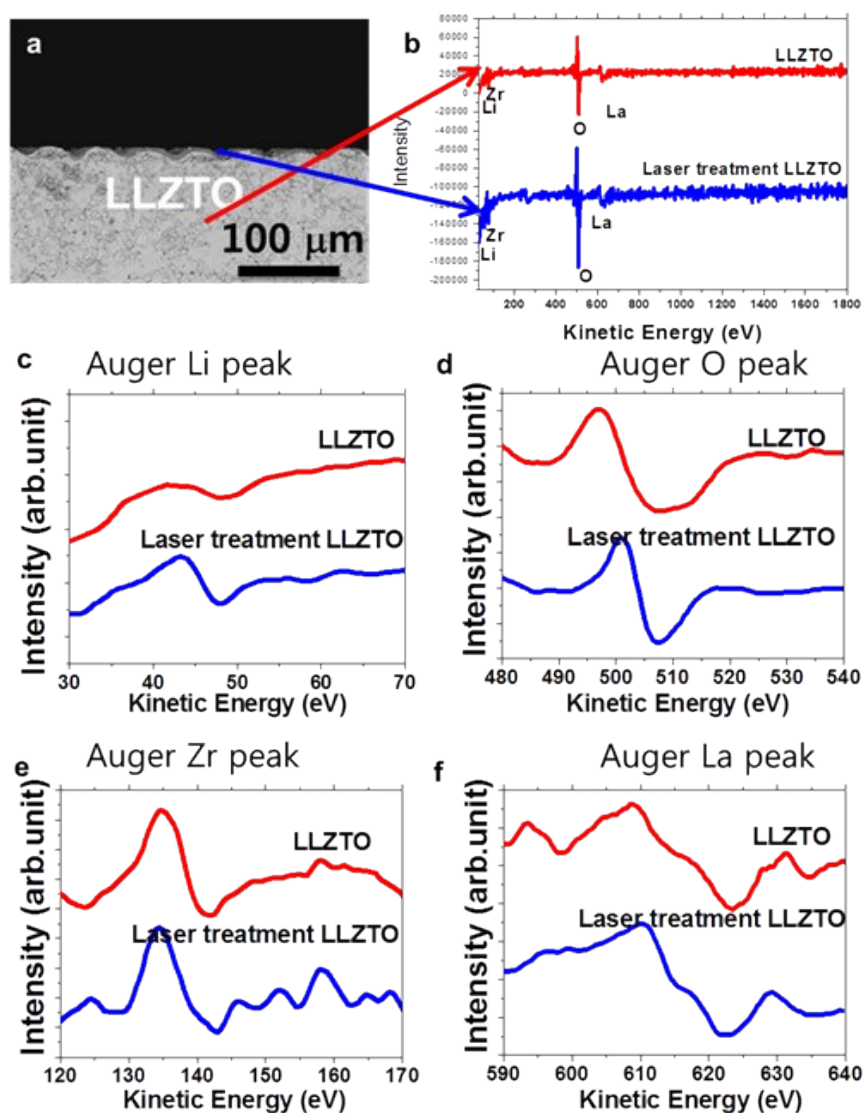

Figure S2. (a) Cross-sectional SEM image of laser-treated LLZTO. (b) Auger spectra of pristine and laser-treated LLZTO regions. (c) Li, (d) O, (e) Zr and (f) La Auger peaks acquired on pristine and laser-treated LLZTO regions.

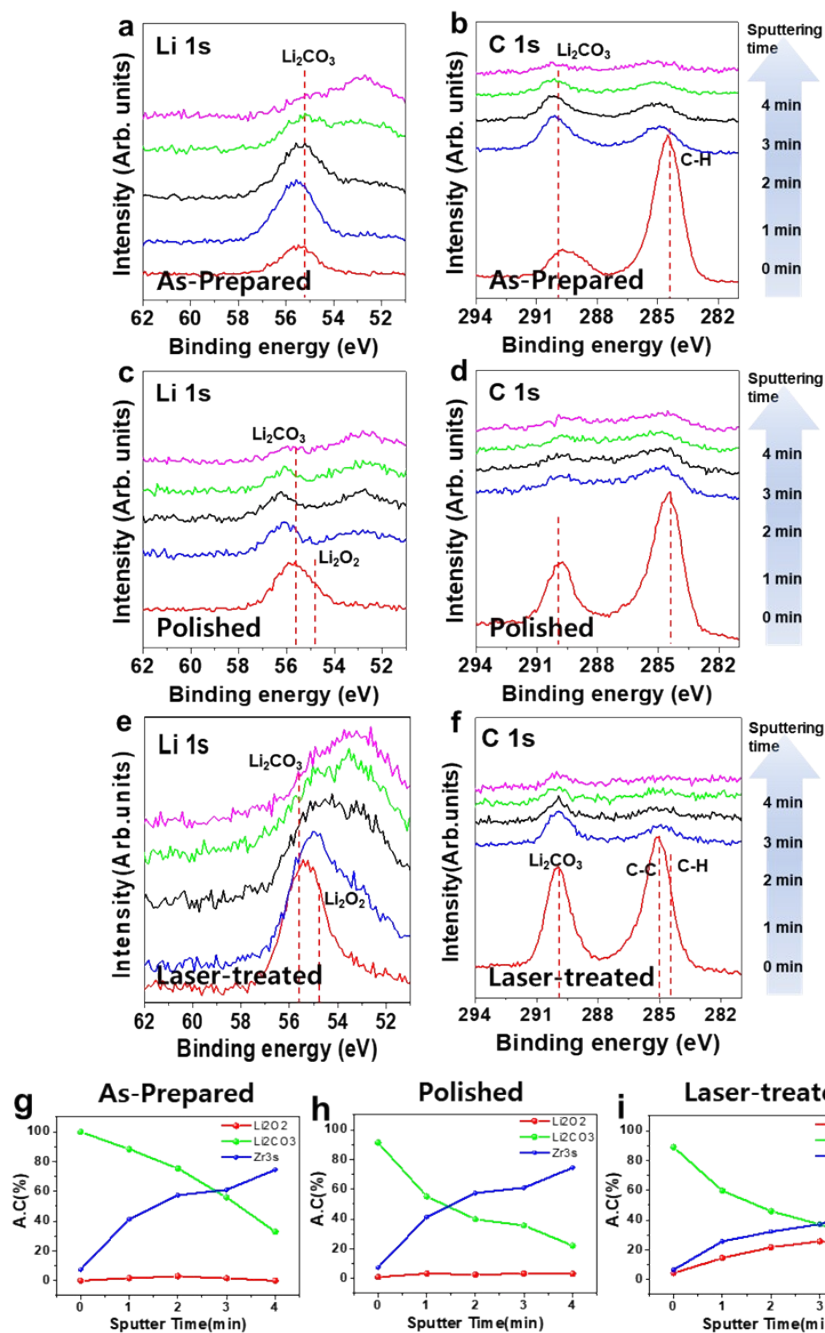

Figure S3. XPS Depth profiles for as-prepared, polished, and laser-treated LLZTO samples. (a) Li 1s and (b) C 1s peaks of as-prepared LLZTO sample. (c) Li 1s and (d) C 1s peaks of polished LLZTO sample. (e) Li 1s and (f) C 1s peaks of laser-treated LLZTO sample. (g)-(i) Atomic concentrations of  $\text{Li}_2\text{O}_2$ ,  $\text{Li}_2\text{CO}_3$ , Zr3s phases for (g) as-prepared, (h) polished, and (i) laser-treated LLZTO samples.

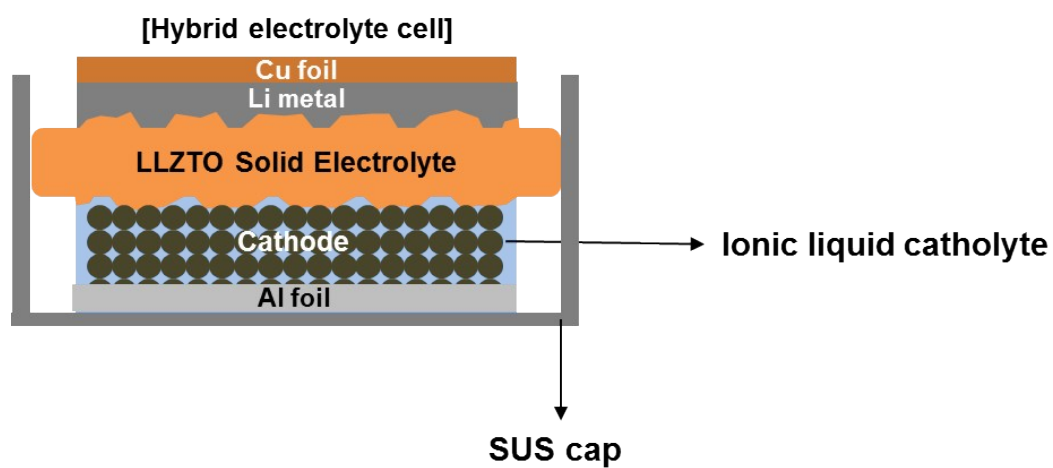

Figure S4. Schematic diagram of hybrid electrolyte cell. (SUS cap, Cu and Al foils obtained from Wellcos Corp.)

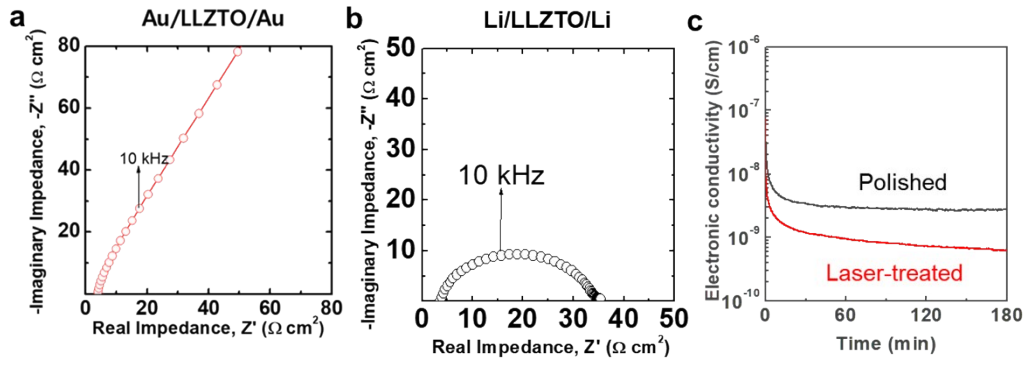

Figure S5. (a), (b) AC-impedance spectra acquired from (a) Au/LLZTO/Au and (b) Li/LLZTO/Li cells. (c) Electronic conductivity results for the polished and the laser-treated LLZTO samples.

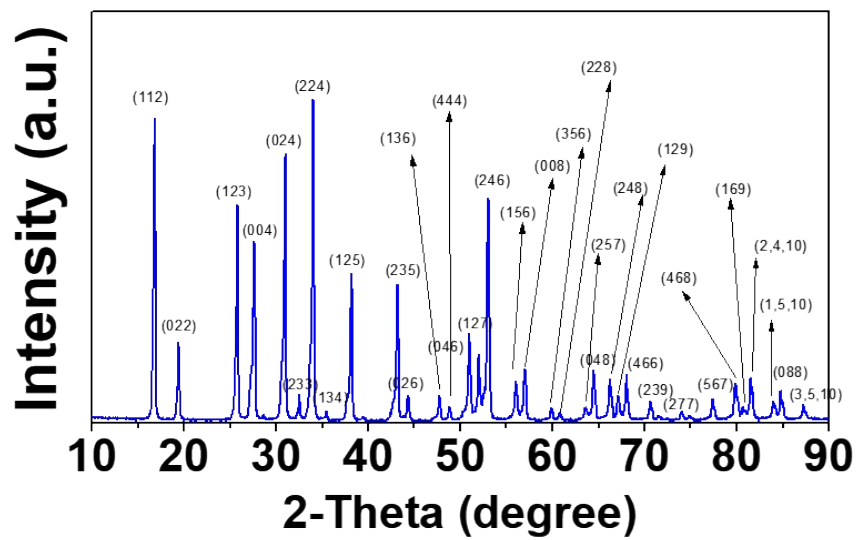

Figure S6. XRD data for LLZTO sample.
